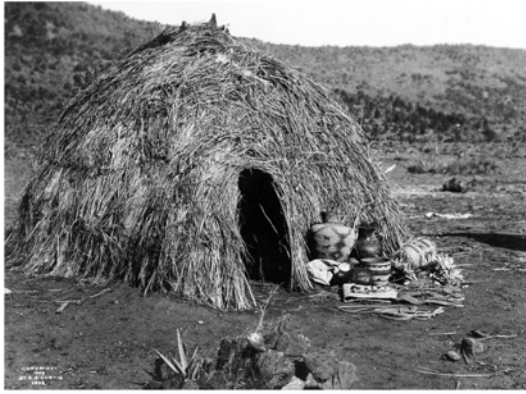

A

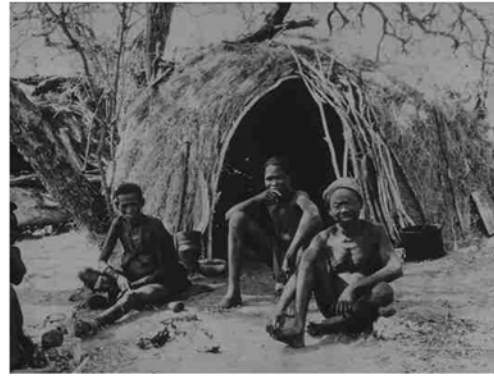

B

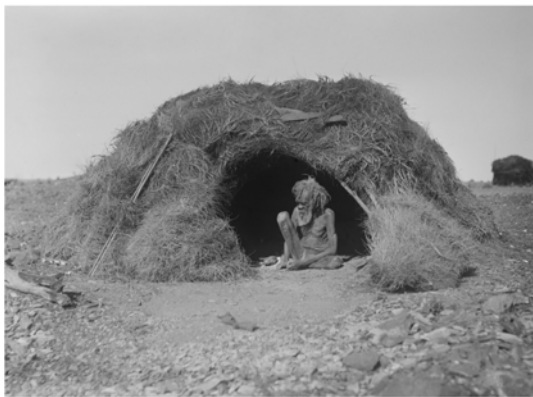

C

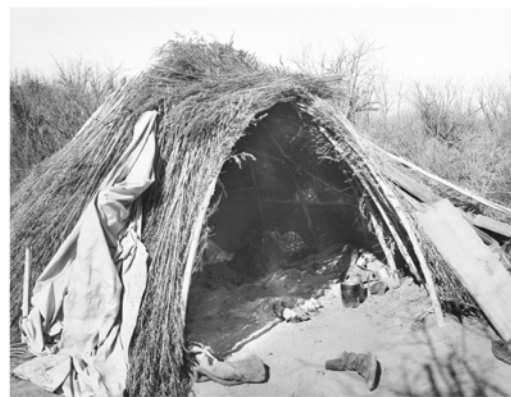

D

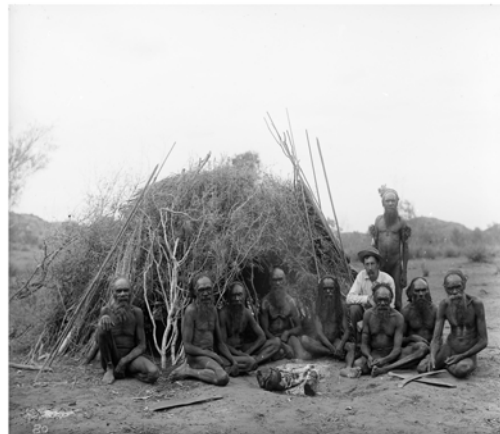

E

S1 Fig. Ethnographic examples of dome-shaped dwellings in hunter-gatherer campsites. **A.** Apache Wickiup, Edward Curtis, 1903 by Library of Congress. Licensed under Public domain via Wikimedia Commons. **B.** Bushmen San. Licensed under Public domain via Wikimedia Commons. **C.** Hut Eastern Arrernte by Herbert Basedow - National Museum of Australia. Licensed under Public domain via Wikimedia Commons. **D.** Apache Indian Kan or brush house, ca.1900 (CHS-3581) by Pierce, C.C. (Charles C.). Licensed under Public domain via Wikimedia Commons. **E.** Baldwin Spencer seated with the Arrernte elders, Alice Springs, Central Australia, 1896. - Google Art Project by Walter Baldwin Spencer and Francis J Gillen.
